# Supplementary material for: FLAS: fast and high-throughput algorithm for PacBio long-read self-correction
Source: Oxford University Press journal article supplement (doi:10.1093/bioinformatics/btz206), 2019-03-19
Supplement: bioinformatics_35_20_3953_s4.pdf [file bioinformatics_35_20_3953_s4.pdf]

Table S-1. Evaluation with various coverage of the *E. coli* long reads. The coverage in tests (a)-(d) is 50x, 80x, 150x and 200x, respectively. The error corrected long reads by MECAT and FLAS (below dashed line), and the other existing self-correction algorithms HGAP, LoRMA, FALCON, Canu and Canu+ (above dashed line) are compared in each test. The best result in each column is shown in boldface. The performance measurements are listed in section 3.2.2.

| Method                                                    | Throughput (bp)    | Alignment ratio | Alignment identity | Time (h)   | Memory (GB) |
|-----------------------------------------------------------|--------------------|-----------------|--------------------|------------|-------------|
| <i>(a) Long reads of 50x coverage (250,204,859 bp)</i>    |                    |                 |                    |            |             |
| HGAP                                                      | 123,745,180        | 95.4%           | 99.3%              | 1.0        | 2.4         |
| LoRMA                                                     | 107,523,523        | 85.7%           | <b>99.8%</b>       | 0.3        | 24.8        |
| FALCON                                                    | 211,654,731        | <b>98.3%</b>    | 99.3%              | 0.6        | 32.3        |
| Canu                                                      | 124,024,894        | 96.5%           | 99.0%              | 0.3        | <b>1.6</b>  |
| Canu+                                                     | 215,937,028        | 96.6%           | 99.1%              | 0.7        | 2.1         |
| MECAT                                                     | 177,717,383        | 97.3%           | 99.4%              | <b>0.1</b> | 2.4         |
| FLAS                                                      | <b>217,459,369</b> | 96.7%           | 99.3%              | 0.2        | 2.4         |
| <i>(b) Long reads of 80x coverage (397,486,752 bp)</i>    |                    |                 |                    |            |             |
| HGAP                                                      | 173,564,650        | 95.4%           | 99.4%              | 2.0        | 7.2         |
| LoRMA                                                     | 310,602,850        | 92.7%           | <b>99.9%</b>       | 0.9        | 36.4        |
| FALCON                                                    | 245,895,710        | 97.0%           | 99.4%              | 1.3        | 46.2        |
| Canu                                                      | 158,007,936        | 95.6%           | 98.9%              | 0.3        | <b>2.7</b>  |
| Canu+                                                     | 315,881,753        | 96.5%           | 99.2%              | 1.5        | 3.4         |
| MECAT                                                     | 284,138,161        | <b>97.2%</b>    | 99.6%              | <b>0.1</b> | 2.9         |
| FLAS                                                      | <b>346,737,024</b> | 96.8%           | 99.6%              | 0.2        | 2.9         |
| <i>(c) Long reads of 150x coverage (795,178,646 bp)</i>   |                    |                 |                    |            |             |
| HGAP                                                      | 309,120,988        | 95.4%           | 99.5%              | 4.1        | 9.6         |
| LoRMA                                                     | 561,802,249        | 97.0%           | <b>99.9%</b>       | 2.8        | 48.6        |
| FALCON                                                    | 488,661,417        | 96.7%           | 99.5%              | 5.8        | 59.6        |
| Canu                                                      | 258,445,060        | <b>97.4%</b>    | 99.3%              | 1.0        | <b>3.4</b>  |
| Canu+                                                     | 471,025,187        | 96.2%           | 99.1%              | 1.9        | 4.3         |
| MECAT                                                     | 574,049,529        | 97.3%           | 99.7%              | <b>0.3</b> | 5.0         |
| FLAS                                                      | <b>671,662,346</b> | 96.8%           | 99.7%              | 0.6        | 5.0         |
| <i>(d) Long reads of 200x coverage (1,078,811,834 bp)</i> |                    |                 |                    |            |             |
| HGAP                                                      | 397,553,406        | 95.3%           | 99.4%              | 5.5        | 10.7        |
| LoRMA                                                     | 739,372,112        | 96.1%           | <b>99.9%</b>       | 6.2        | 52.8        |
| FALCON                                                    | 677,623,010        | 96.6%           | 99.5%              | 10.6       | 60.2        |
| Canu                                                      | 262,676,389        | <b>97.8%</b>    | 99.4%              | 1.0        | <b>3.4</b>  |
| Canu+                                                     | 672,908,829        | 96.3%           | 99.1%              | 3.0        | 4.3         |
| MECAT                                                     | 795,567,126        | 97.2%           | 99.7%              | <b>0.5</b> | 6.3         |
| FLAS                                                      | <b>916,699,023</b> | 96.7%           | 99.7%              | 1.0        | 6.3         |

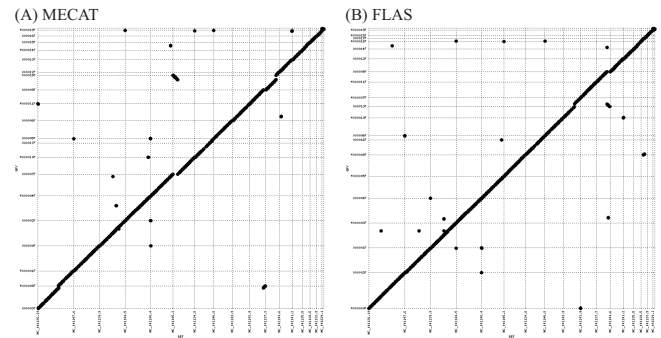

Fig. S-1: MUMmer plots of the *S. cerevisiae* contigs by FALCON\*, assembled from the MECAT corrected long reads (A) and FLAS corrected long reads (B), respectively.

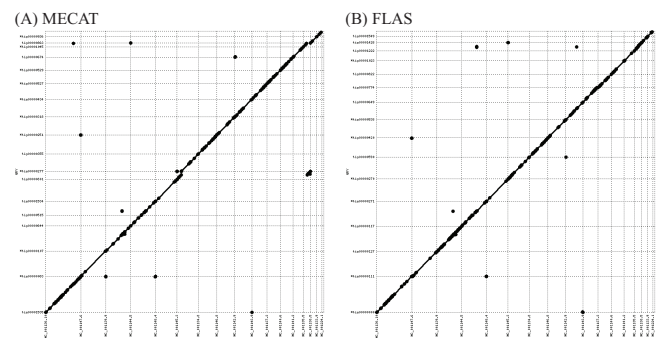

Fig. S-2: MUMmer plots of the *S. cerevisiae* contigs by Canu\*, assembled from the MECAT corrected long reads (A) and FLAS corrected long reads (B), respectively.

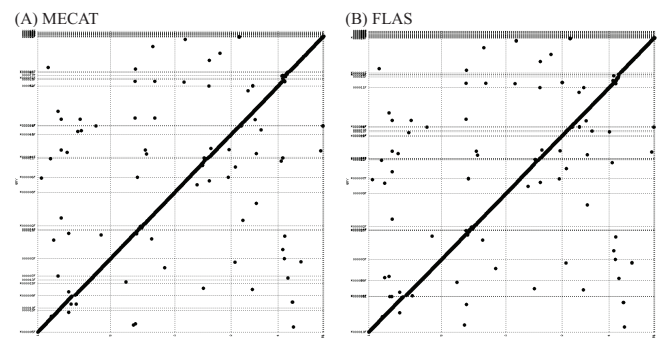

Fig. S-3: MUMmer plots of the *A. thaliana* contigs by FALCON\*, assembled from the MECAT corrected long reads (A) and FLAS corrected long reads (B), respectively.
